# Supplementary material for: A Genome-Wide Analysis of RNA Pseudoknots That Stimulate Efficient −1 Ribosomal Frameshifting or Readthrough in Animal Viruses
Source: Hindawi journal article supplement (doi:10.1155/2013/984028), 2013-01-01
Supplement: f1 [file 984028.f1.pdf]

Sequence #: M11841 (8173) nucleotides

Energy 1: -34.710000 (kcal/mol): Start=2337 S1=6 S2=6 L1=1 L2=12 L3=0 End=2373

GAAACAAGCTTA A  
CCCCGG ACCCG  
CCATCAGGGAAACGGACTGAGGGGCC TGGGGCGG

~~Energy 2: -24.750000 (kcal/mol): Start=2351 S1=6 S2=6 L1=4 L2=39 L3=1 End=2417~~

~~—————CGTCAGCTTTCTTCAGCCAAACAAAACAACCCATTCA—————AAAC  
—————CGGGGT A TTCGAA  
GACTGAGCGGCCAGCCCCAGCCCCCG—————AAGCTTAC~~

Energy 3: -23.680000 (kcal/mol): Start=3480 S1=5 S2=6 L1=4 L2=36 L3=0 End=3541

ATTAATGGGAGCTTTACAACCTGGATTGCCCTCTCC TAAT  
TGGTA TCACCG  
GGCTCTTACAAGATTTACGAGCCGT GGTGGCTA

Energy 4: -23.325000 (kcal/mol): Start=1502 S1=7 S2=5 L1=1 L2=11 L3=0 End=1537

CACATTAGCCA C  
ATACCCC GTCAT  
TAAAAACGGCTGCCTCTCAATATGGGG TAGTAGA

Energy 5: -23.280000 (kcal/mol): Start=7255 S1=6 S2=6 L1=1 L2=29 L3=1 End=7308

GAGGCATCTGCTTAGCTTTACAGGAAAAA G  
GGACGA G ACGACA  
CAAAACAGAAGAGGATTAGATCTGCT TGCTGTTT

Energy 6: -23.010000 (kcal/mol): Start=6464 S1=5 S2=7 L1=6 L2=15 L3=2 End=6508

CTTTGCCCGAAGCCC ACTTTC  
GGTCT CC CACCATT  
AATTGCATAAATCGCTGTTCCAGA GTGGTAAAG

~~Energy 7: -22.910000 (kcal/mol): Start=3444 S1=6 S2=10 L1=8 L2=29 L3=2 End=3512~~

~~—————ACCAGCCGTTAATGCCACTATCGCTATTAA—————CGTAAATC  
—————TTTACA AC ATTCTGGCAG  
CCATATTTGTTATAAAAAAGAAATCT—————TGGGAGCTTTAC~~

~~Energy 8: 22.750000 (kcal/mol): Start=7264 S1=6 S2=7 L1=4 L2=20 L3=0 End=7313~~

~~—————TACGTTTACAGCAAAAATCC—————CCAG~~

~~—————TCCTCT—————ACCGAGC~~

~~ACAGGATTACATCTGCTGACAGCAGA—————TGTTTCTAC~~

Energy 9: -22.370000 (kcal/mol): Start=1310 S1=5 S2=6 L1=8 L2=27 L3=0 End=1366

CAACATATCCCTAAAGGAAAATGCTGC CACACCTC

GGGGC CGGTCA

CAGAAACTGCAGGGGGCTTTTCTCG GCCAGTCG

~~Energy 10: 22.140000 (kcal/mol): Start=3520 S1=5 S2=6 L1=1 L2=13 L3=1 End=3555~~

~~—————TCGCTATCCACAC—————T~~

~~—————GGCCT—C—TCCCGT~~

~~ATTAATGGCAGCTTTACAACCTGCA—————AGCCTATC~~

Energy 11: -22.025000 (kcal/mol): Start=6081 S1=5 S2=8 L1=2 L2=18 L3=0 End=6126

CCCCTACAGCCAGCCCC CA

TCATC TGTGTGTG

TTCAGTAACCAACTCCCTAAAGTGG ACACATATAG

Energy 12: -21.995000 (kcal/mol): Start=6588 S1=6 S2=6 L1=2 L2=5 L3=0 End=6618

TGCTT AA

GTCGGT CGTTAG

TGTTTCTCCCAACGCCAATTAGCCG GCGGTCAG

Energy 13: -21.485000 (kcal/mol): Start=2683 S1=5 S2=8 L1=2 L2=8 L3=0 End=2718

CCTACCTC AG

TCCTA ATTAACTC

TTACTGTTCTCAAGGCAACAGGAT TAATTGAGAC

~~Energy 14: 21.235000 (kcal/mol): Start=2690 S1=7 S2=5 L1=10 L2=27 L3=0 End=2750~~

~~—————ACAGACAATAAACTACAAACCCCTAT—————AATCCTCCTA~~

~~—————GACTTAA—————TCTCG~~

~~TCCTCAAGGCAACAGGATAGCTCAATT—————ACAGGAC~~

Energy 15: -21.215000 (kcal/mol): Start=1744 S1=5 S2=6 L1=4 L2=30 L3=0 End=1799

TTGCTCAAATTCAAGCGGCTGCTACAAAAG ATGA

TGTTA GGCCT

TCTAGCACTGATGCACAAATGCAAT CCTGGAGA

Energy 16: -21.005000 (kcal/mol): Start=206 S1=5 S2=8 L1=2 L2=33 L3=0 End=266

TTGCCACCATTAAACGAGACTTGATCAGAACAC AT

ACGCA ACAGAATA

CTCCCCTCCCACCTTACTGCCTGTGT TGTCTTGCT

Energy 17: -21.005000 (kcal/mol): Start=8029 S1=5 S2=8 L1=2 L2=33 L3=0 End=8089

TTGCCACCATTAAACGAGACTTGATCAGAACAC AT

ACGCA ACAGAATA

CTCCCCTCCCACCTTACTGCCTGTGT TGTCTTGCT

~~Energy 18: -20.755000 (kcal/mol): Start=7256 S1=5 S2=5 L1=3 L2=8 L3=0 End=7286~~

~~CCAGGCAT CAC~~

~~CACCA CACCA~~

~~AAAACAGAACAGCATTAGATCTGCT CTGCTTA~~

Energy 19: -20.545000 (kcal/mol): Start=2762 S1=8 S2=5 L1=8 L2=47 L3=0 End=2842

CCTATTACCTGTCAGAAGCCCTCCTTAACATTATGGTTAGATGATAA TCAGACAT

AACCTGGG TTATA

CTATAGAGGACAAGGAAGTTTTGGATCC AATGTTC

Energy 20: -20.520000 (kcal/mol): Start=6369 S1=8 S2=5 L1=4 L2=9 L3=0 End=6407

AGGGCCTCA CACA

GGAGGTAG TCTGT

GGTTTGCTGGAATAGCCAACCCTCTGTT AGATAAG

Energy 21: -20.510000 (kcal/mol): Start=2905 S1=6 S2=7 L1=10 L2=3 L3=2 End=2943

TAA CCTATAACAG

TTAACC AA TTCCATA

AGCTAGAGGACTGGCCTCCTAATTGG GAGGTATAG

Energy 22: -20.450000 (kcal/mol): Start=5810 S1=6 S2=5 L1=1 L2=36 L3=3 End=5868

AGATTGCCTTTTTCCTTTGCTCACAGAGATGAACTTC G

GTCCCT CTC TTAGT

ATACCTAACATAACCAATCCAGGGA AATCATC

Energy 23: -20.320000 (kcal/mol): Start=3314 S1=7 S2=6 L1=1 L2=12 L3=1 End=3352

AGTGAAAACTT C

CCAATTA C CGGTGA

AAATCAGACGAACCTGTCTGGGTTGAT GCTGCTGC

Energy 24: -20.095000 (kcal/mol): Start=7088 S1=5 S2=5 L1=5 L2=3 L3=0 End=7115

TGG ATCTA

CGTCA GGGCC

TAGGATTAGGTATAACTACTGCAGT TCTGGGG

Energy 25: -20.000000 (kcal/mol): Start=2352 S1=5 S2=5 L1=4 L2=5 L3=2 End=2380

CGGTC AAAC

GGGGT AT TCGAA

ACTGAGGGGCCAGCCCCAGGCCCCG AGCTTTG

~~Energy 26: -19.995000 (kcal/mol): Start=2368 S1=7 S2=5 L1=3 L2=23 L3=0 End=2417~~

~~-----GCCAACAAAAACAACCCATTTC-----GTC~~

~~-----ACCTTGT-----TTCGA~~

~~CACGCCCCCAAACAAGCTTATCCGGCC-----AAGCTTA~~

Energy 27: -19.830000 (kcal/mol): Start=2228 S1=5 S2=5 L1=3 L2=45 L3=0 End=2295

TGTAAAAGAGGGAAACATTGGGCCAATGAATGCAAATCCAAAAC ACT

GGACC CTGTC

ACAATTCTGAAACAAAGGCTCCTGG GATAGTC

~~Energy 28: -19.760000 (kcal/mol): Start=1503 S1=5 S2=6 L1=1 L2=12 L3=1 End=1537~~

~~-----ACACATTACCCA-----C~~

~~-----TACCC-----C-----GTCATG~~

~~AAAAACGGCTGCCTCTCAATATGGG-----TACTAGAA~~

Energy 29: ~~19.550000 (kcal/mol): Start=2817 S1=6 S2=7 L1=7 L2=33 L3=1 End=2882~~

~~-----CACAGGATTAATCGATACCGCAGCTGATCTCAC-----ATCGTTA-----  
-----TTCTAA A ATACTAG-----  
ACCTGTCACAAGCCCTCCTTAACATT-----TATCATCAA-----~~

Energy 30: -19.550000 (kcal/mol): Start=4900 S1=5 S2=6 L1=8 L2=23 L3=1 End=4952

ACCTATAGCCCACGGCAACCAAA GCCCATTC  
GGTCC A TCCGGT  
ACCTTTTACATCGGACATGTCAGG AGGCTGAC

Energy 31: -19.360000 (kcal/mol): Start=728 S1=6 S2=5 L1=5 L2=29 L3=2 End=783

AATTTAATTAAAGAATTGATAGATAAGAA ACTGC  
GGTCAT AC TCTTC  
CTTTTGGCCCTGAGAAAGTCCCAGTA AGAAGTT

Energy 32: -19.155000 (kcal/mol): Start=6589 S1=5 S2=6 L1=2 L2=14 L3=0 End=6626

~~-----CTCCTTCCCCTCAG-----AA-----  
-----TCGGT-----CCTTAG-----  
GTTTCCTCCCAACGCCAATTAGCCG-----GTCATCCC-----~~

Energy 33: ~~18.950000 (kcal/mol): Start=5855 S1=7 S2=6 L1=1 L2=49 L3=3 End=5930~~

~~-----ACCTGCAGCTTACTGATAATATCTCAAATATTCCAAGTTCAAGCCGGTT-----A-----  
-----CTTTACT ACT AACTTC-----  
TCCCTTTTCCTTTGCTCAGACAGATGA-----TTCGACAT-----~~

Energy 34: -18.930000 (kcal/mol): Start=3 S1=7 S2=5 L1=5 L2=46 L3=1 End=77

ATGTCTTGGCCTCTGTTTGTCTAGCTCTACGCTTAAGATTCAAGA AGCCG  
GTAGGCC C GTCGT  
CCTGTCCGG TGGCGAA

Energy 35: -18.930000 (kcal/mol): Start=7826 S1=7 S2=5 L1=5 L2=46 L3=1 End=7900

ATGTCTTGGCCTCTGTTTGTCTAGCTCTACGCTTAAGATTCAAGA AGCCG  
GTAGGCC C GTCGT  
ATATATTTAAAAGGGTGACCTGTCCGG TGGCGAA

Energy 36: -18.740000 (kcal/mol): Start=3095 S1=5 S2=7 L1=2 L2=44 L3=1 End=3164

GTCACTGCCCAAATGTTAGCCCAAGGCTACAGCCCCGAAAAGG AG

ATACA G TGATCCT

TTCTCAAATGAAAATTATGATGTGT ATTAGGAAA

~~Energy 37: -18.720000 (kcal/mol): Start=1739 S1=6 S2=6 L1=8 L2=27 L3=2 End=1797~~

~~CTCAAATTC AAGCGGCTGCTACAAAAG CAATATCA~~

~~GTTTGT TA GGGCCT~~

~~ACTATTCTAGCACTGATCCACAAATG CCTGGACA~~

~~Energy 38: -18.600000 (kcal/mol): Start=1286 S1=5 S2=5 L1=6 L2=49 L3=1 End=1360~~

~~TTTCTCCACACCTCACTGCCCCGGCAACATATCCCTAAAGCAAATG ACAAAC~~

~~TCGGG G GACGT~~

~~CAGCAAATCAAACCTCACTACTCC CTGCGCC~~

Energy 39: -18.540000 (kcal/mol): Start=624 S1=5 S2=6 L1=3 L2=3 L3=2 End=651

AGG CCT

GAACG CC TTTGGT

TTTTGATTTTGTAAGGATACTTGT GAACCATA

~~Energy 40: -18.480000 (kcal/mol): Start=3088 S1=6 S2=7 L1=8 L2=42 L3=2 End=3163~~

~~CACTGCCCAAATGTTAGCCCAAGGCTACAGCCCCGAAAAGG ATGTGTAG~~

~~TCATAC AG TCATCCT~~

~~ATCTGCTTTCTCAAATGAAAATTATG ATTAGGAAA~~

Energy 41: -18.440000 (kcal/mol): Start=4613 S1=5 S2=6 L1=7 L2=28 L3=0 End=4669

CATATACTCTTGCTGATACTACCATCAA CTTCCAC

GCCGG TAAGGT

GCTTTATTAGTTTTTACTGATGGCT ATTTCAA

Energy 42: -18.430000 (kcal/mol): Start=1656 S1=5 S2=5 L1=8 L2=6 L3=1 End=1689

GTAATG AAAAGAAA

GCCGA A CAACT

TTTTGAAAATTGTAGAGAAACGGCT GTTGGGA

Energy 43: -18.410000 (kcal/mol): Start=2150 S1=6 S2=6 L1=5 L2=50 L3=3 End=2228

TTTTGCAAAAATTGTTCATGAACATATACATAACAATTCTGAAACAAAGG AAATG

ACAGGA AAG GAGGGC

ATAAAGAAAAGGAGGGTGTGTTTT CTCCTGGA

Energy 44: -18.285000 (kcal/mol): Start=387 S1=5 S2=5 L1=8 L2=44 L3=0 End=458

CGGCCCGGATTAAGAGAAACGAAAGTAAACTTTCTTCGGCCG GAAGACGA

CGTTT GCGC

GTTGATACGAGGGAATTCGTGAG CCGCGGG

~~Energy 45: -18.270000 (kcal/mol): Start=7268 S1=7 S2=5 L1=1 L2=19 L3=0 End=7311~~

~~ACCTTTACACCAAAAATCC G~~

~~TTCGTGT ACGGA~~

~~GATTAGATCTGCTCAGCAGCAGCAGC TCTTTCT~~

~~Energy 46: -18.215000 (kcal/mol): Start=7074 S1=5 S2=5 L1=9 L2=5 L3=0 End=7107~~

~~CCCGG ATAACTACT~~

~~ATCTA TCAGC~~

~~TATTCGCCCTAGTCATAGGATTAGGT ACTGCTG~~

~~Energy 47: -18.080000 (kcal/mol): Start=7052 S1=5 S2=7 L1=1 L2=40 L3=2 End=7116~~

~~ATTAGGTATAACTACTGCACTATCTACCGGCACTGCTGCT T~~

~~GGATA CT GATCCCC~~

~~CACCCAAAACACCAATCCACTTTAT CTGGCGCTT~~

~~Energy 48: -18.030000 (kcal/mol): Start=6358 S1=5 S2=5 L1=5 L2=15 L3=0 End=6397~~

~~ACATGCTCTGATCCAG GCCAA~~

~~CTTGT CTCCC~~

~~AAGGGCCAACCTGCTTTGCTCCAATA CAGGGCC~~

Energy 49: -18.020000 (kcal/mol): Start=1813 S1=8 S2=5 L1=3 L2=37 L3=2 End=1878

CAGGAGTCAAACAAGGACCCGATGAGCCATTTGCAGA ACC

ATTCCCTT CG AGGAC

GCCTGGAGAAAACCTCCCGTTAAGGGAG TTTTGTA

Energy 50: -18.000000 (kcal/mol): Start=4357 S1=5 S2=5 L1=4 L2=49 L3=2 End=4429

AAAAA TACTTTGGAATTGAACCCTCCGTAATCATACAGCCATACTCTAA GGAA

ATGAT AC CAGAG

CGCTATAGCAGATTTAATCATACTA GTCTCAA

Time taken to run: 4716 seconds 350 milliseconds
